# Supplementary material for: A highly stable membrane for vanadium flow batteries (VFBs) enabled by the selective degradation of ionic side chains
Source: Royal Society of Chemistry journal article supplement (doi:10.1039/d1ta09173e), 2021-12-15
Supplement: d1ta09173e1.pdf [file d1ta09173e1.pdf]

## Supporting information

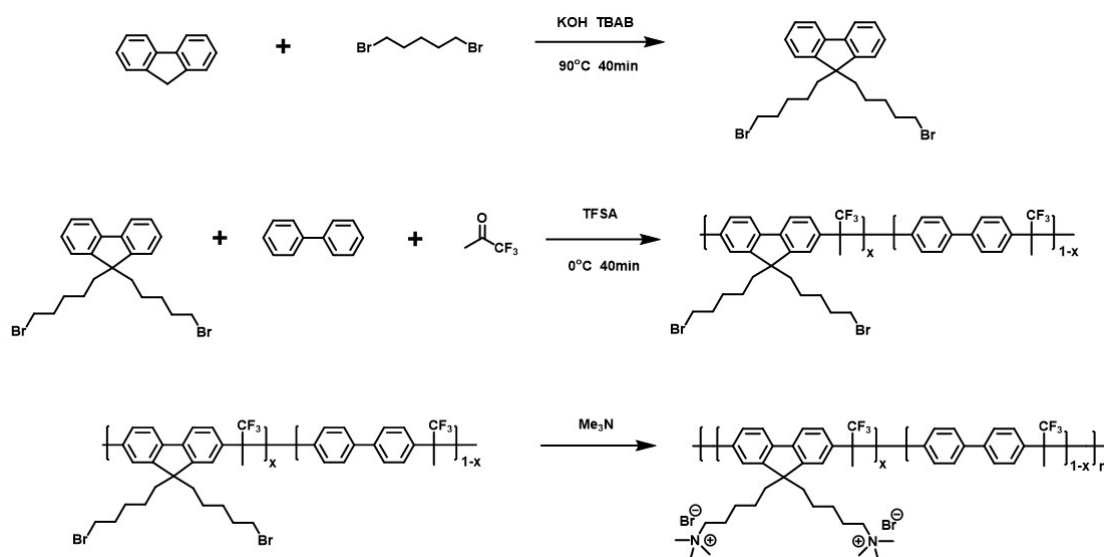

**Figure S1.** The synthesis route of PFBA-QA-x

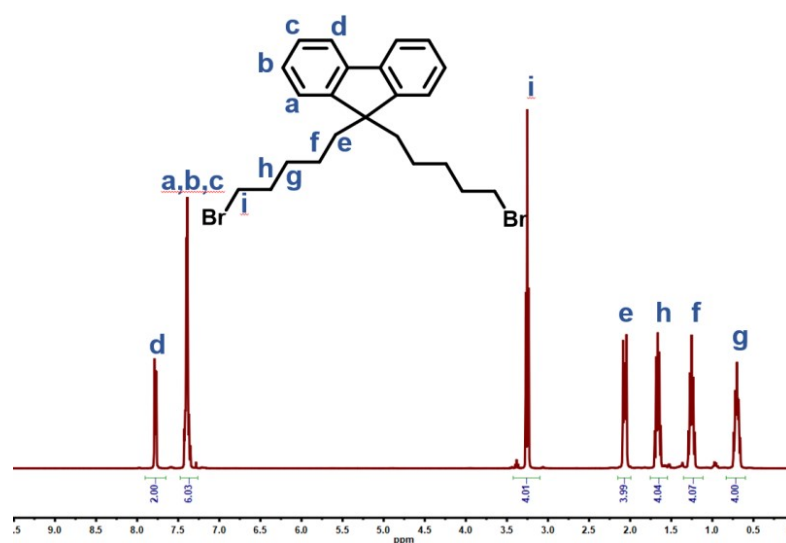

**Figure S2.** The <sup>1</sup>H NMR spectra of BBPF

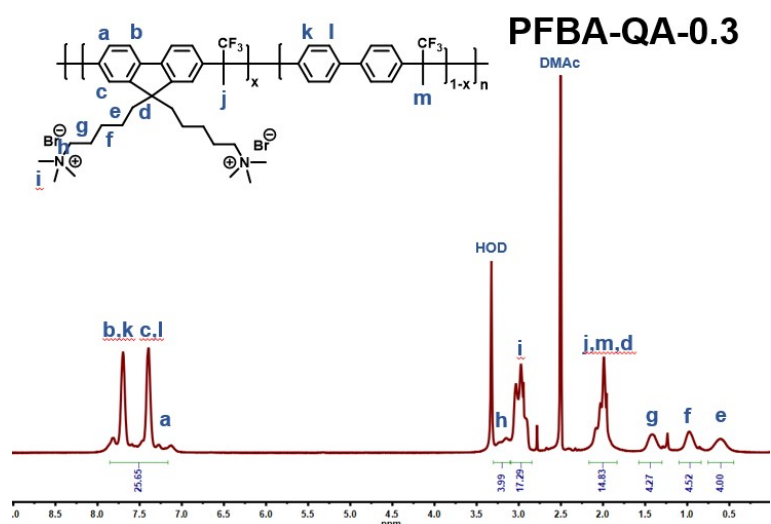

**Figure S3.** The  $^1\text{H}$  NMR spectra of PFBA-QA-0.3

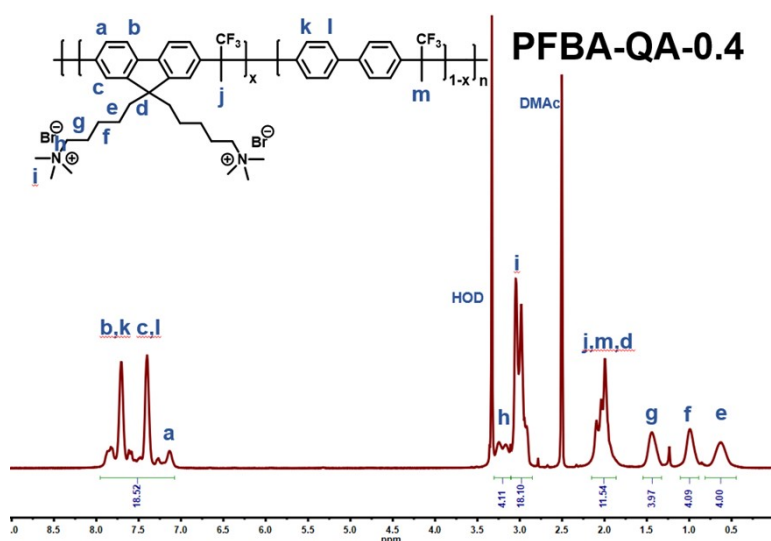

**Figure S4.** The  $^1\text{H}$  NMR spectra of PFBA-QA-0.4

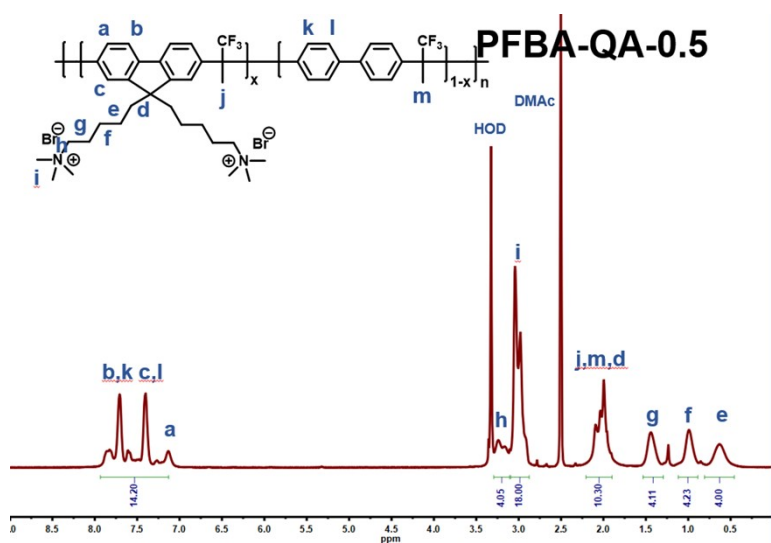

**Figure S5.** The  $^1\text{H}$  NMR spectra of PFBA-QA-0.5

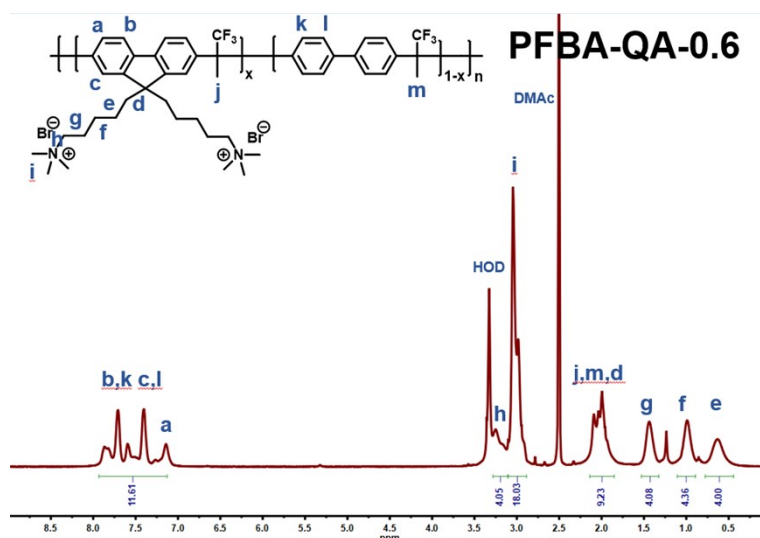

**Figure S6.** The  $^1\text{H}$  NMR spectra of PFBA-QA-0.6

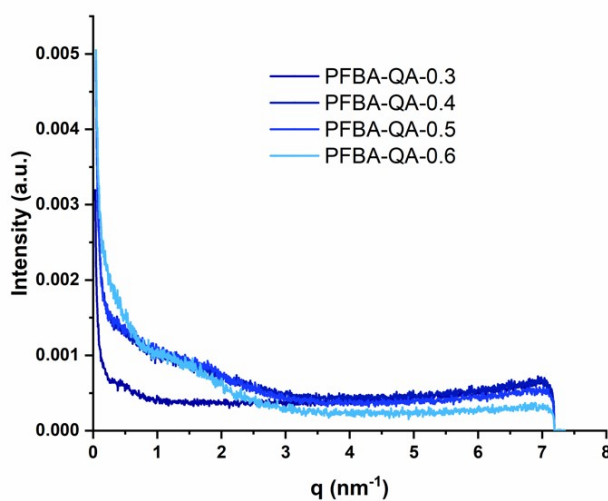

**Figure S7.** SAXS of PFBA-QA- $x$  ( $x = 0.3, 0.4, 0.5, 0.6$ ).

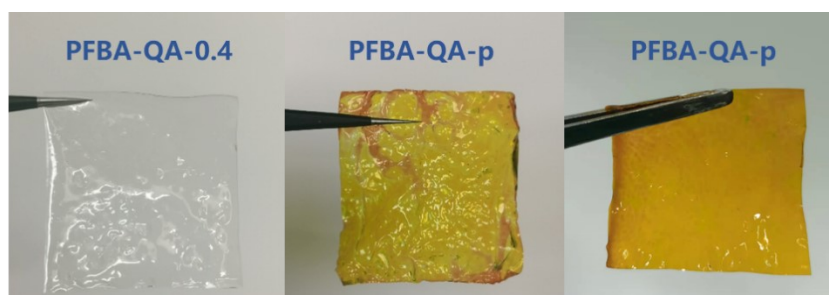

**Figure S8.** (a) Digital image of PFBA-QA-0.4. (b) Digital image of PFBA-QA-p by on-line method. (c) Digital image of PFBA-QA-p by off-line method.

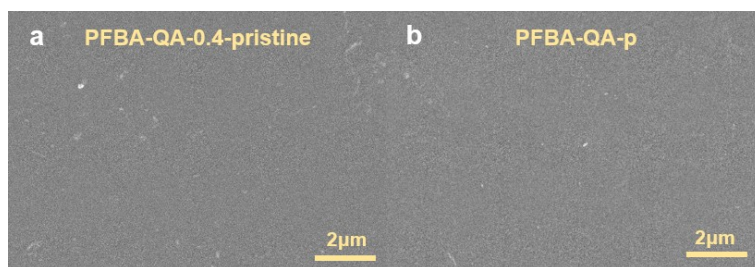

**Figure S9.** (a) SEM image of PFBA-QA-0.4 (b) SEM image of PFBA-QA-p.

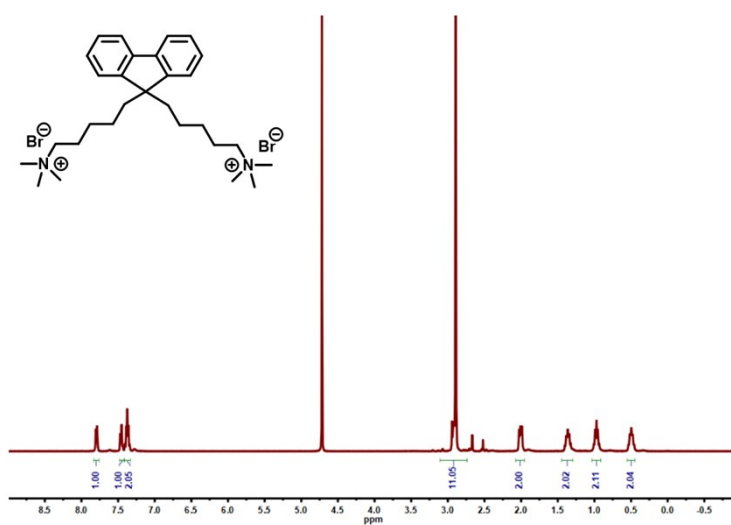

**Figure S10.** The  $^1\text{H}$  NMR spectra of model compound.

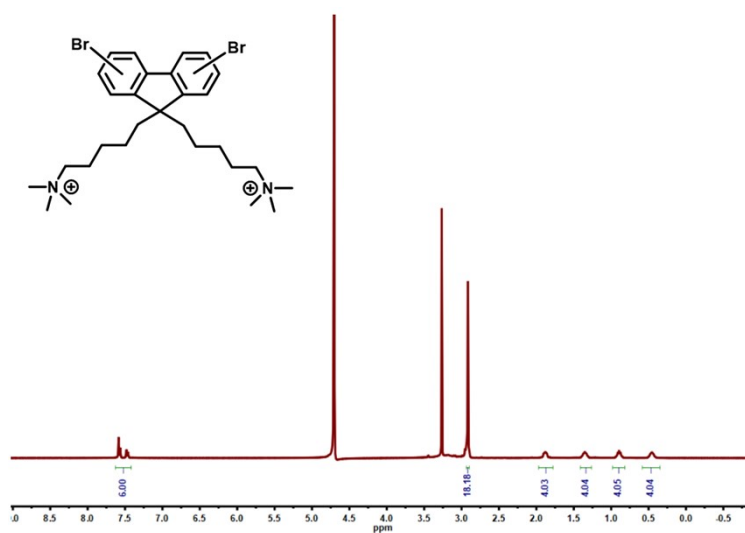

**Figure S11.** The  $^1\text{H}$  NMR spectra of degraded model compound.

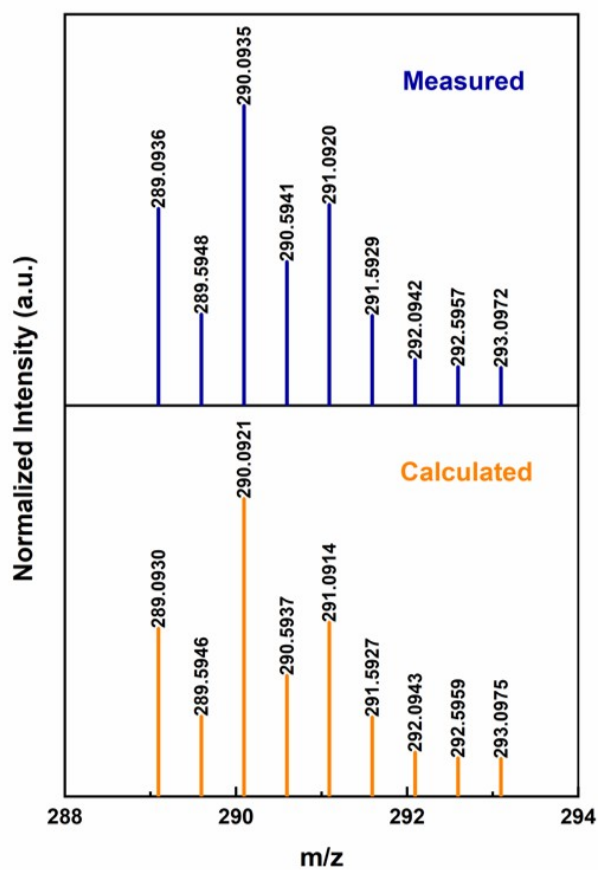

**Figure S12.** The mass spectrometry of model compound before and after oxidation.

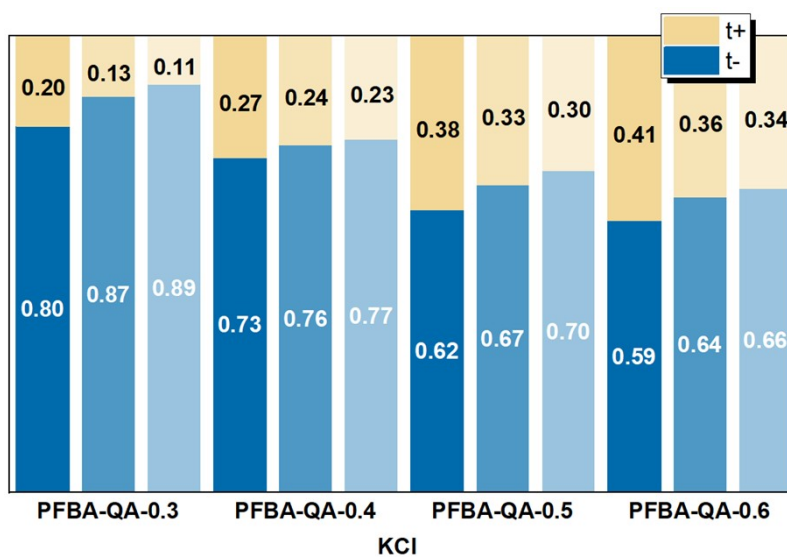

**Figure S13.** The KCl ITN of PFBA-QA-x.

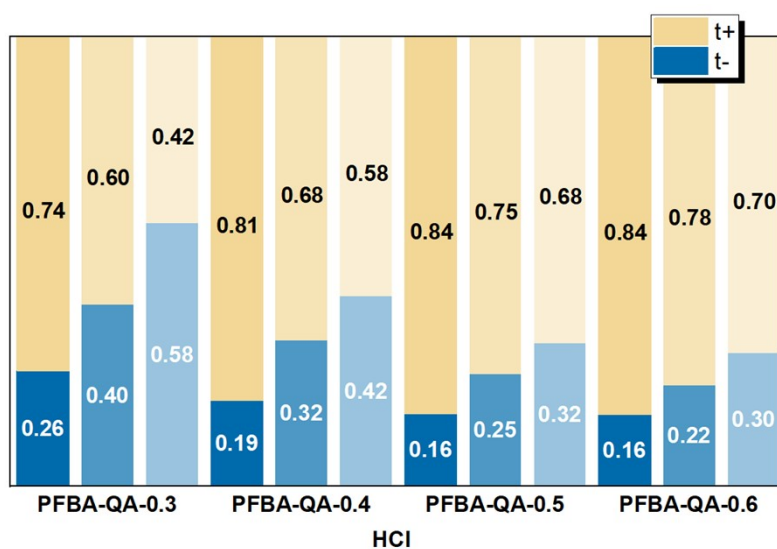

**Figure S14.** The HCl ITN of PFBA-QA-x.

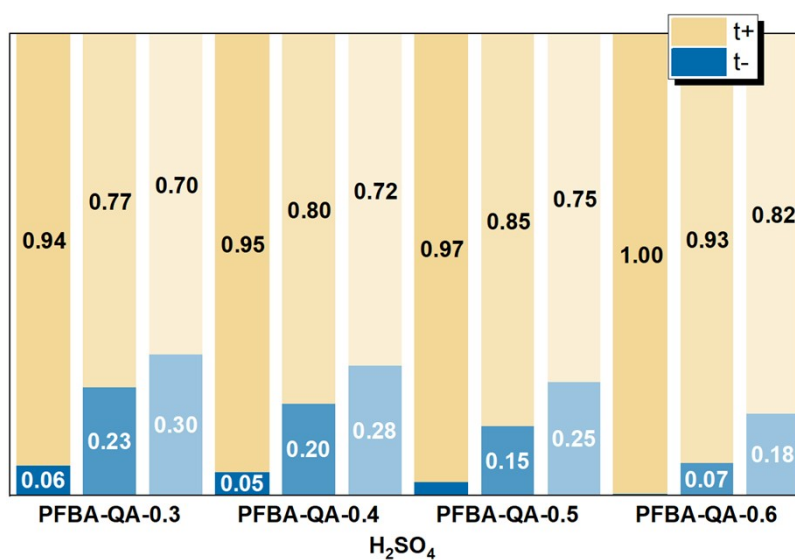

**Figure S15.** The  $H_2SO_4$  ITN of PFBA-QA-x.

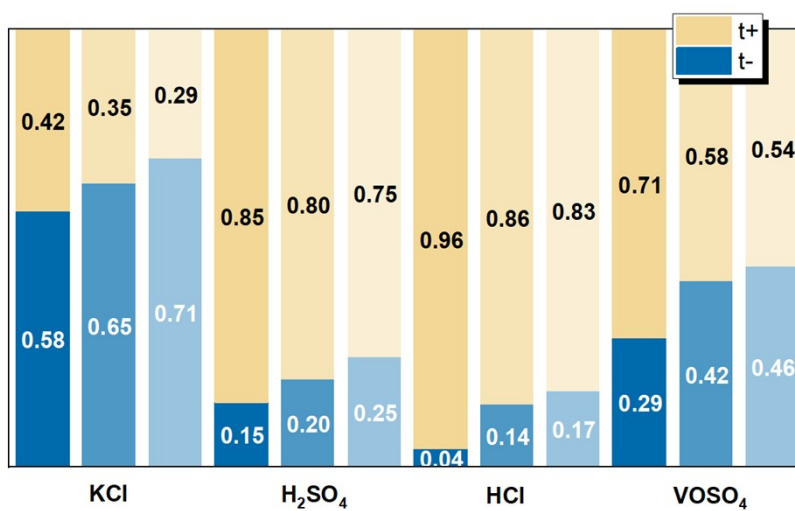

**Figure S16.** The ITN of PFBA-QA-p in KCl,  $H_2SO_4$ , HCl and  $VOSO_4$ .

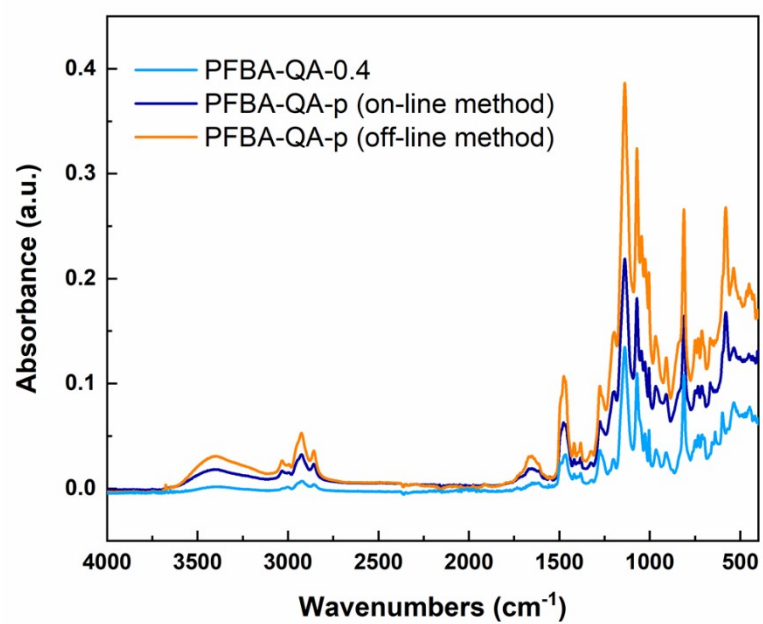

**Figure S17.** The FTIR image of PFBA-QA-0.4, PFBA-QA-p by on-line and off-line methods.
